# Supplementary material
Source: PubMed Central journal article supplement (PMC5547743)

**Figure S1**

**A**

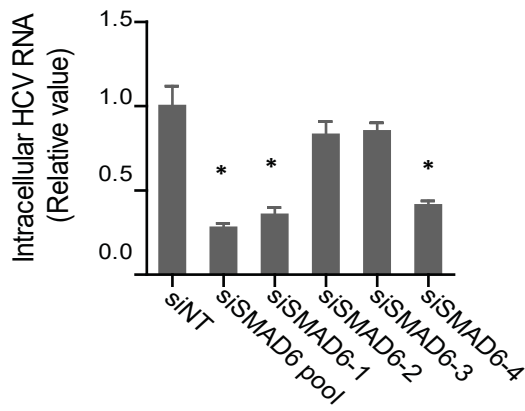

**B**

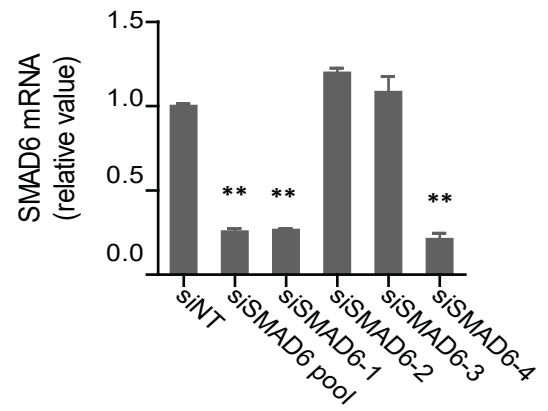

**C**

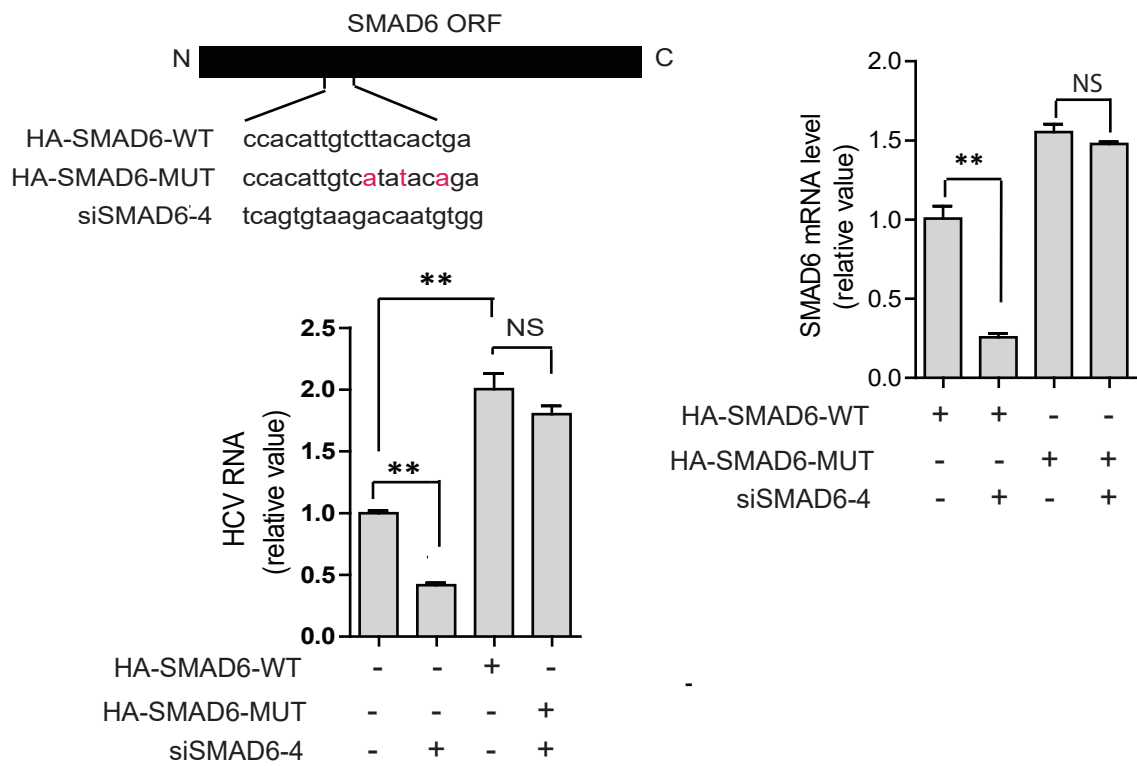

Supplement: NIHMS820239-supplement-2.pdf [file NIHMS820239-supplement-2.pdf]

Figure S2

**A**

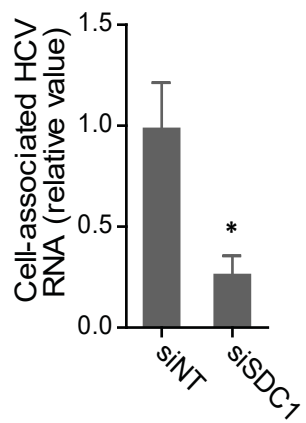

**B**

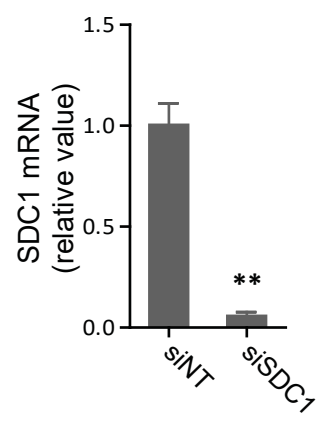

Supplement: NIHMS820239-supplement-3.pdf [file NIHMS820239-supplement-3.pdf]

**Figure S3**

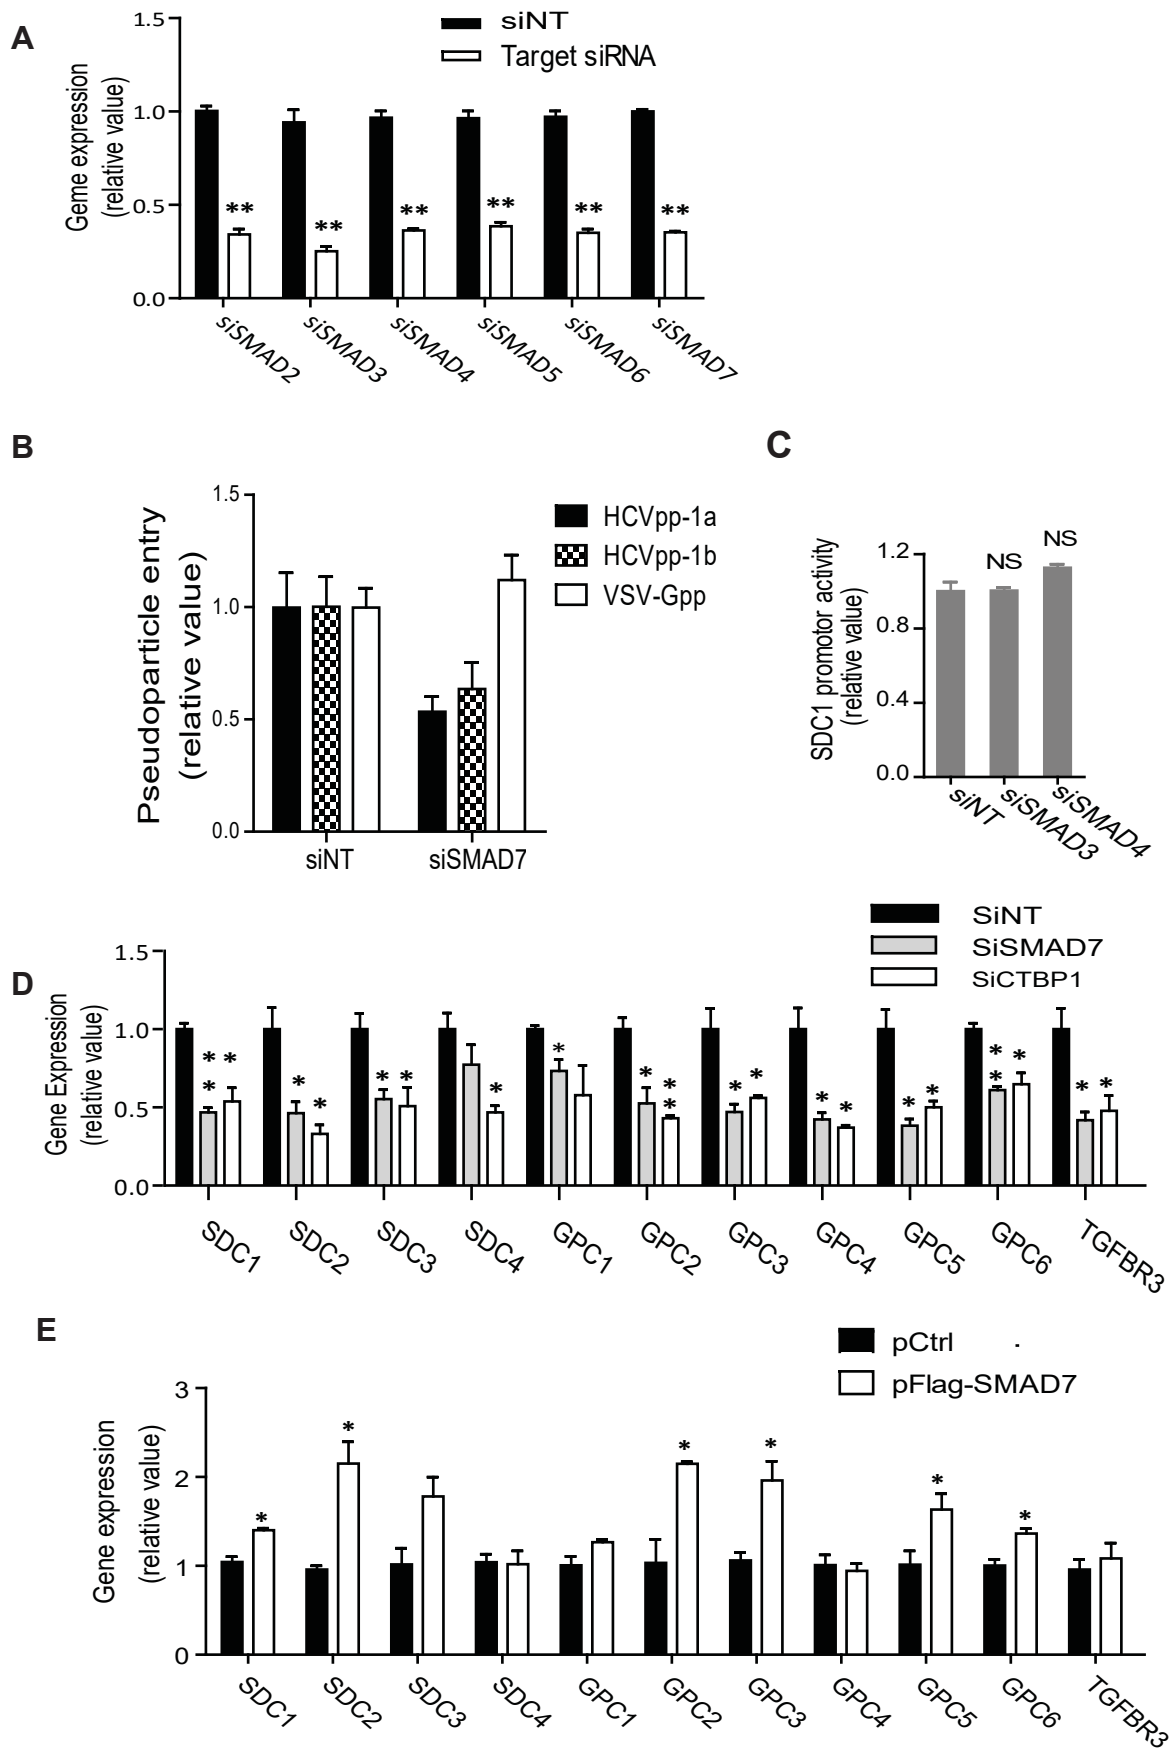

Supplement: NIHMS820239-supplement-4.pdf [file NIHMS820239-supplement-4.pdf]

Figure S4

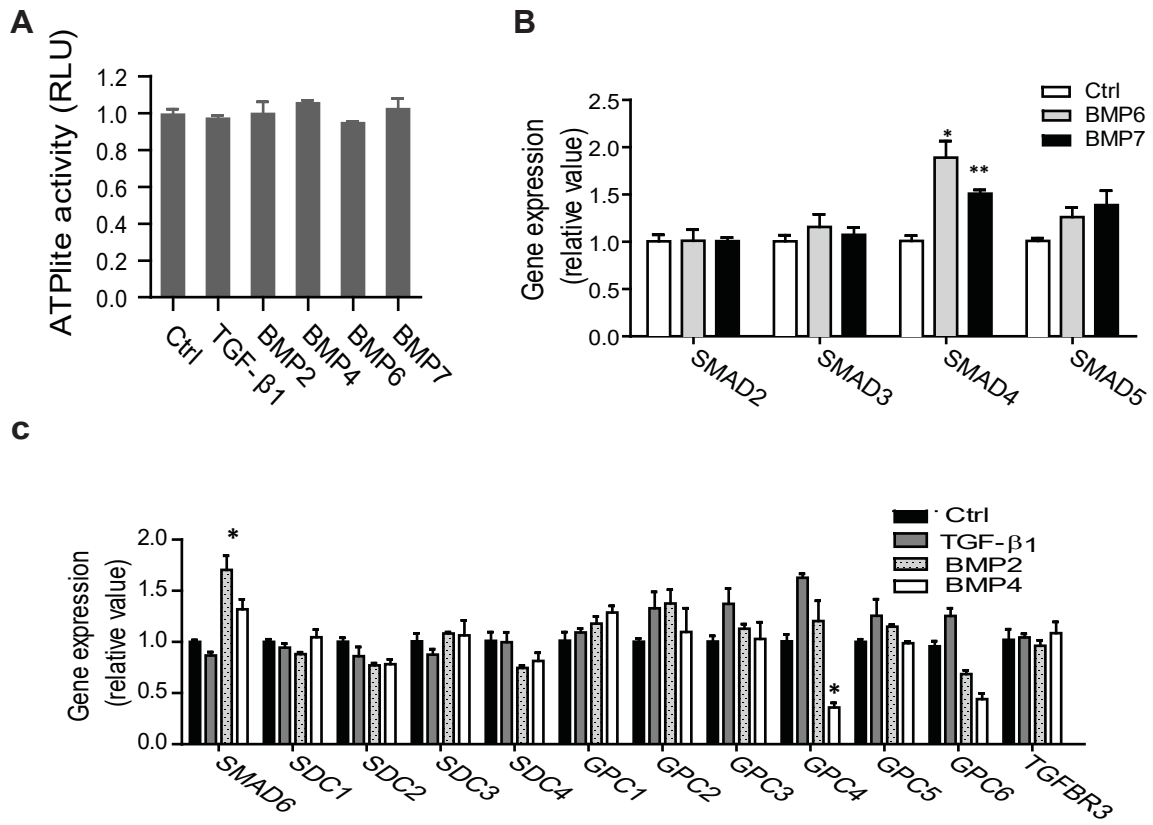

Supplement: NIHMS820239-supplement-5.pdf [file NIHMS820239-supplement-5.pdf]

**Figure S5**

**A**

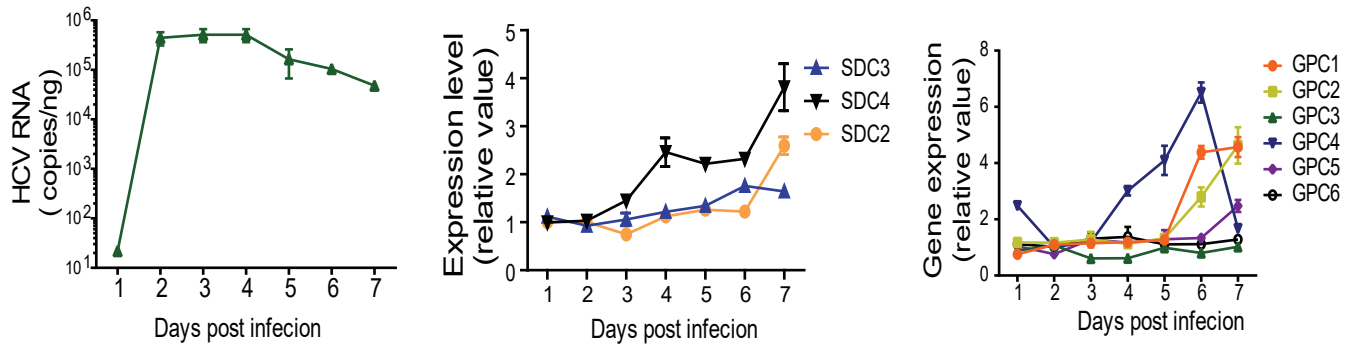

**B**

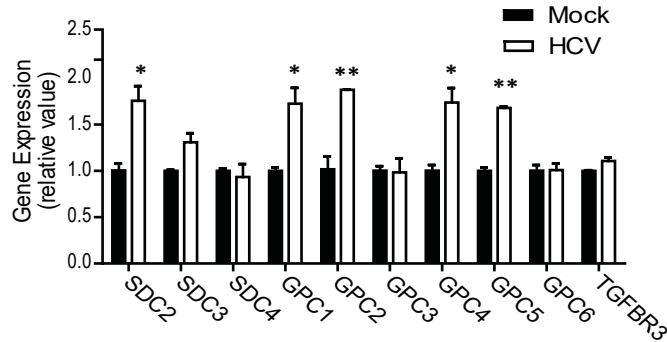

**C**

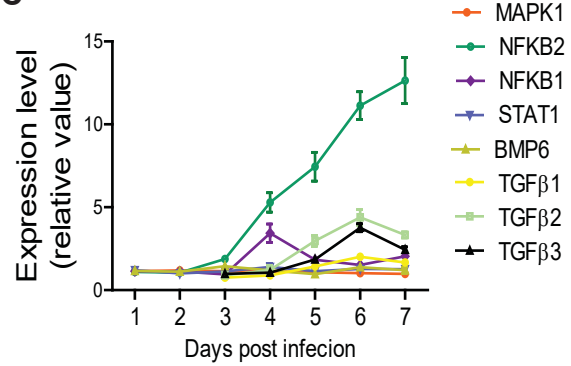

**D**

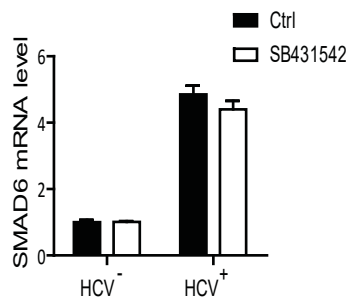

**E**

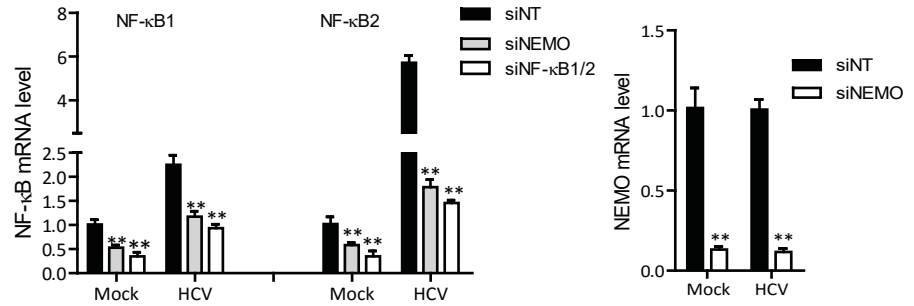

**F**

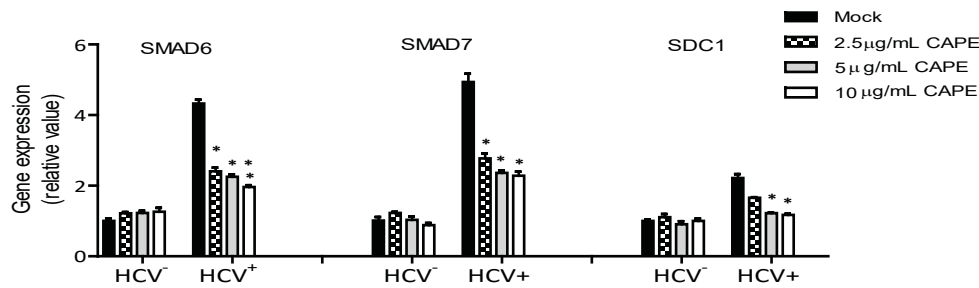

**G**

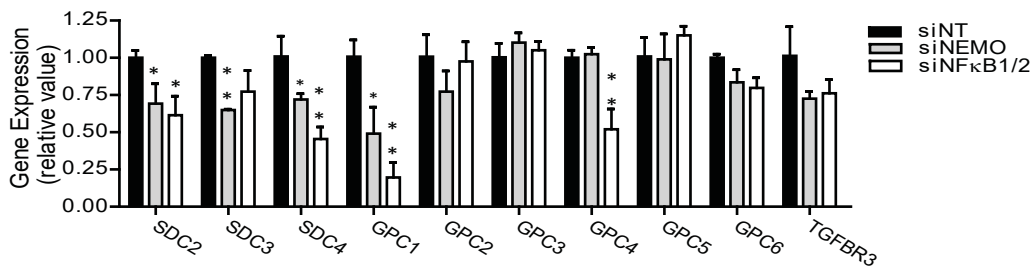

Supplement: NIHMS820239-supplement-6.pdf [file NIHMS820239-supplement-6.pdf]
